# Supplementary material
Source: PubMed Central journal article supplement (PMC5462034)
Supplement: supp_pp.17.00392_PP2017-BT-00392DR1_Supplemental_Material.pdf [file supp_pp.17.00392_PP2017-BT-00392DR1_Supplemental_Material.pdf]

1 **Supplemental Data**

2

3 **Short Title: Virus-induced Flowering (VIF) Assay**

4

5 **Corresponding Author:** Yiguo Hong

6 Research Centre for Plant RNA Signaling, College of Life and Environmental Sciences,

7 Hangzhou Normal University, Hangzhou 310036, China and Warwick-Hangzhou RNA

8 Signaling Joint Laboratory, School of Life Sciences, University of Warwick, Coventry

9 CV4 7AL, UK.

10

11 **Telephone:** +86-571-28866065

12 **Fax:** +86-571-28866065

13 **E-mails:** [yiguo.hong@hznu.edu.cn](mailto:yiguo.hong@hznu.edu.cn); [yiguo.hong@warwick.ac.uk](mailto:yiguo.hong@warwick.ac.uk)

14

15 **Primary Research Area:** Flowering and Reproduction/Breakthrough Technologies

16 **2<sup>nd</sup> Research Area:** Genes and Development

17 **Article Title: A Virus-induced Flowering Assay for Functional**  
18 **Dissection and Analysis of Monocot and Dicot *FT* genes<sup>1</sup>**

19

20 Cheng Qin<sup>2</sup>, Weiwei Chen<sup>2</sup>, Jiajia Shen, Linming Cheng, Femi Akande, Ke Zhang,  
21 Chen Yuan, Chunyang Li, Pengcheng Zhang, Nongnong Shi, Qi Cheng, Yule Liu,  
22 Stephen Jackson, Yiguo Hong\*

23

24 Research Centre for Plant RNA Signaling, College of Life and Environmental Sciences,  
25 Hangzhou Normal University, Hangzhou 310036, China (C.Q., W.C., J-J.S., L.C., K.Z.,  
26 C.Y., P.Z., N.S., Y.H.); Biotechnology Research Institute, Chinese Academy of  
27 Agricultural Sciences, Beijing 100081, China (Q.C.); Centre for Plant Biology and  
28 MOE Key Laboratory of Bioinformatics, School of Life Sciences, Tsinghua University,  
29 Beijing 100084, China (Y.L.); Warwick-Hangzhou RNA Signaling Joint Laboratory,  
30 School of Life Sciences, University of Warwick, Coventry CV4 7AL, UK (F.A, C.L.,  
31 S.J., Y.H.)

32

33 <sup>1</sup>**Funding:** This work was supported by grants from the Ministry of Agriculture of  
34 China (National Transgenic Program 2016ZX08009-001-004 to Y.H.); the National  
35 Natural Science Foundation of China (NSFC 31370180 to Y.H., 31500251 to C.Q.,  
36 31601765 to W.C.); Hangzhou Normal University (Pandeng Program 201108 to Y.H.);  
37 the Hangzhou City Education Bureau (Innovative Program for Science Excellence  
38 20131028 to Y.H.); the UK Biotechnology & Biological Sciences Research Council  
39 (UK BBSRC–China Partnering Award BB/K021079/1 to S.J. and Y.H.); and the  
40 Zhejiang Provincial Natural Science Foundation (LY14C010005 to N.S.).

41

42 <sup>2</sup>These authors contributed equally to this work.

43

44 **Author Contributions:** C.Q. and W.C. designed and performed experiments; J-J.S.,  
45 L.C., F.A., K.Z., C.Y., C.L. and P.Z. performed research; C.Q., N.S., Q.C., Y.L. and S.J.

46 were involved in the analysis of data and helped writing the paper. S.J. was also  
47 involved in designing experiments. Y.H. conceived and initiated the project, designed  
48 experiments, analysed data and wrote the paper.

49

50 **One-sentence Summary:** A PVX-based VIF assay was designed in order to identify  
51 amino acids in the FT protein that are essential for flowering, and to examine floral  
52 induction by mono- and dicotyledonous *FT* genes.

53

54 \*Address correspondence to [yiguo.hong@hznu.edu.cn](mailto:yiguo.hong@hznu.edu.cn); [yiguo.hong@warwick.ac.uk](mailto:yiguo.hong@warwick.ac.uk)

55 The author responsible for distribution of materials integral to the findings presented in  
56 this article in accordance with the policy described in the instructions for Authors  
57 ([www.plantphysiol.org](http://www.plantphysiol.org)) is: Yiguo Hong ([yiguo.hong@hznu.edu.cn](mailto:yiguo.hong@hznu.edu.cn),  
58 [yiguo.hong@warwick.ac.uk](mailto:yiguo.hong@warwick.ac.uk)).

59 **Supplemental Figure**

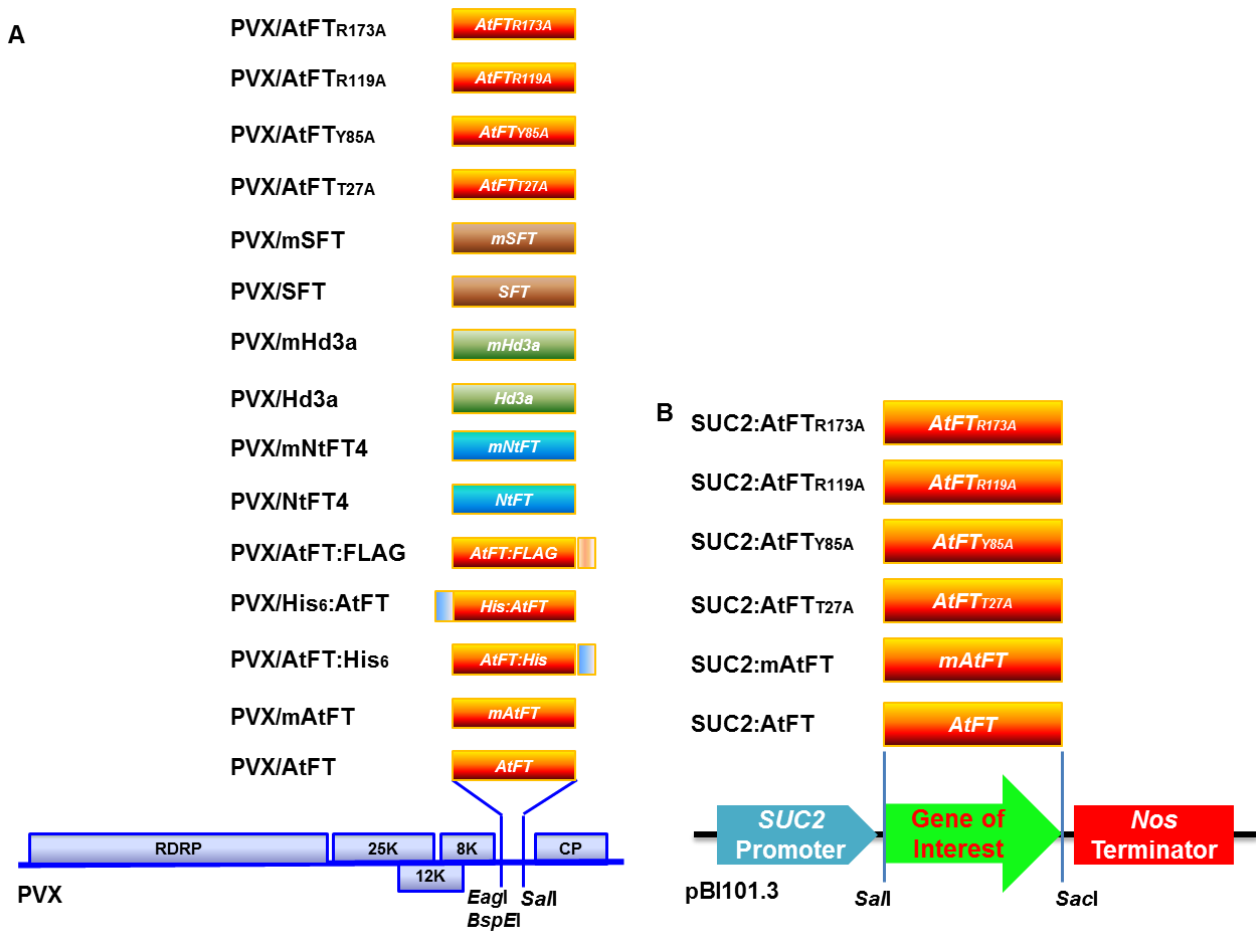

60 **Supplemental Figure S1.** Constructs used in this study. A, Diagrammatic of Potato  
 61 virus X (PVX)-based ViFA vectors. Wild-type, mutated non-translatable (m) and single  
 62 amino acid substituted Arabidopsis *AtFT* coding sequences were cloned into the PVX  
 63 vector to produce each of the ViFA vector as indicated. B, Plant transformation vector  
 64 for wild-type and mutant *AtFT* alleles as indicated. The genome organization of PVX  
 65 (A) and the outline of the binary vector pBI101.3 (B) are indicated. Restriction enzyme  
 66 sites used to clone relevant genes into the two vectors are also indicated.

67 **Supplemental Tables**68 **Supplemental Table S1.** Oligonucleotide primers used in this study.

| Primer | Sequences (5' – 3')                   | Genes and origin *              |
|--------|---------------------------------------|---------------------------------|
| RC0061 | TCAAGATCCGGAATGTCTATAAATATAAGAGAC     | <i>AtFT</i> , <i>BspEI</i>      |
| RC0062 | GAAGAAGTCGACCTAAAGTCTTCTTCCTCCGCA     | <i>AtFT</i> , <i>SalI</i>       |
| RC0066 | TCAAGATCCGGATAGTCTTAAATATAAGAGAC      | <i>AtFT</i> , <i>BspEI</i>      |
| RC0536 | TCAAGACGGCCGATGGCCGGAAGTGGCAGGGACAG   | Rice <i>Hd3a</i> , <i>EagI</i>  |
| RC0537 | GAAGAAGTCGACCTAGGGGTAGACCCTCCTGCCGCC  | Rice <i>Hd3a</i> , <i>SalI</i>  |
| RC0538 | TCAAGACGGCCGATAGGCCGGAAGTGGCAGGGACAG  | Rice <i>Hd3a</i> , <i>EagI</i>  |
| RC0541 | TCAAGACGGCCGATGCCTAGAGAACGTGATCCTCTT  | Tomato <i>SFT</i> , <i>EagI</i> |
| RC0542 | GAAGAAGTCGACTCAATCAGCAGATCTTCTACGTCC  | Tomato <i>SFT</i> , <i>SalI</i> |
| RC0543 | TCAAGACGGCCGATAGCCTAGAGAACGTGATCCTCTT | Tomato <i>SFT</i> , <i>EagI</i> |
| RC0779 | TCAAGACGGCCGATGCCAAGAATAGATCCTTTGATA  | MM <i>NtFT4</i> , <i>EagI</i>   |
| RC0780 | GAAGAAGTCGACTTAATATGCGCGGCGGC         | MM <i>NtFT4</i> , <i>SalI</i>   |
| RC1639 | TCAAGACGGCCGATAGCCAAGAATAGATCCTTTGATA | MM <i>NtFT4</i> , <i>EagI</i>   |
| RC0693 | ATAAGTAACCTTTAGAGCGATTGATCTATTTAA     | <i>AtFTT27A</i>                 |
| RC0694 | TTTAATAGATCAATCGCTCTAAAGGTTACTTAT     | <i>AtFTT27A</i>                 |
| RC0695 | CACCAACCAATGGAGAGCTTCTCGGAGGTGAGG     | <i>AtFTY85A</i>                 |
| RC0696 | CCTCACCTCCGAGAAGCTCTCCATTGGTTGGTG     | <i>AtFTY85A</i>                 |
| RC0699 | CAATATAAACACGACAGCATGAATTCCTGCAGT     | <i>AtFTR119A</i>                |
| RC0700 | ACTGCAGGAATTCATGCTGTCGTGTTTATATTG     | <i>AtFTR119A</i>                |
| RC0701 | GAAGAAGTCGACCTAAAGTCTTGCTCCTCCGCA     | <i>AtFTR173A</i> , <i>SalI</i>  |
| RC0783 | TCAAGAGTCGACATGTCTATAAATATAAGAGACCCT  | <i>SalI</i>                     |
| RC0784 | GAAGAAGAGCTCCTAAAGTCTTCTTCCTCCGCAGCC  | <i>SacI</i>                     |
| RC0798 | TCAAGAGTCGACTAGTCTATAAATATAAGAGACCCT  | <i>SalI</i>                     |
| RC0799 | GAAGAAGAGCTCCTAAAGTCTTGCTCCTCCGCAGCC  | <i>SacI</i>                     |
| RC1305 | AAGCAACCCAAACCTGAGGGAGTATCTG          | qRT-PCR <i>NtFTI</i>            |
| RC1306 | GCAGCAACAGGCGAATTGAGATTATGAAATCTC     | qRT-PCR <i>NtFTI</i>            |

|          |                                                                     |                                         |
|----------|---------------------------------------------------------------------|-----------------------------------------|
| RC1307   | AGATATCCCTGCAACCACAGAAGCAAC                                         | qRT-PCR <i>NtFT2</i>                    |
| RC1308   | AAACAGCGGCAACAGGCAAATTGAGAC                                         | qRT-PCR <i>NtFT2</i>                    |
| RC1309   | AATTGTCCACCAACCTAGGGTTGACGTG                                        | qRT-PCR <i>NtFT3</i>                    |
| RC1310   | CATTCACAACATCTCGAGTCAATTGTGCGAAACAG                                 | qRT-PCR <i>NtFT3</i>                    |
| RC1311   | GATATCCCAGCAACTACAGATAACAAG                                         | qRT-PCR <i>NtFT4</i>                    |
| RC1312   | GAAACGGGCAAACCAAGATTGTAAAC                                          | qRT-PCR <i>NtFT4</i>                    |
| RC1313   | TGAGATGCACCACGAAGCTC                                                | qRT-PCR <i>NtEF1<math>\alpha</math></i> |
| RC1314   | CCAACATTGTCACCAGGAAGTG                                              | qRT-PCR <i>NtEF1<math>\alpha</math></i> |
| RC1317   | AGGCCTTCTCAGGTTCAAACAAGC                                            | qRT-PCR <i>AtFT</i>                     |
| RC1318   | TGCCAAAGGTTGTTCCAGTTGTAGC                                           | qRT-PCR <i>AtFT</i>                     |
| PP82     | CAGTGTTGGCTTGCAAACACTAG                                             | PVX                                     |
| PP356    | AGGAAGAAG <b>TCGACT</b> AAAGTCTTCTCCTCCGCAG                         | <i>AtFT</i> , <i>SalI</i>               |
| His-FTF  | <u>GGCCGGCCG</u> ATGCATCATCACCATCACCCTCTATAAATATA<br>AGA            | <i>AtFT</i> , <i>EagI</i>               |
| His-FTR  | <u>GGCGTCGAC</u> CCTAAAGTCTTCTCCTCCGCAG                             | <i>AtFT</i> , <i>SalI</i>               |
| FT-HisR  | <u>GCGGTCGAC</u> CTAGTGGTGATGGTGATGATGAAGTCTTCTTC<br>CTCCGC         | <i>AtFT</i> , <i>SalI</i>               |
| FT-HisF  | <u>GGCCGGCCG</u> ATGTCTAT AAATATAAGA                                | <i>AtFT</i> , <i>EagI</i>               |
| FT-FLAGR | <u>GCGGTCGAC</u> CTACTTGTGCATCGTCATCCTTGTAGTCAAGTCT<br>TCTCCTCCGCAG | <i>AtFT</i> , <i>SalI</i>               |
| EFNBF    | CTCCAAGGCTAGGTATGATG                                                | RT-PCR <i>NtEF1<math>\alpha</math></i>  |
| EFNBR    | CTTCGTGGTTGCATCTCAAC                                                | RT-PCR <i>NtEF1<math>\alpha</math></i>  |

69 \*Each introduced restriction endonuclease site is highlighted in bold. Sense or non-sense

70 mutated codons are underlined.

71 **Supplemental Table S2.** Flowering time in *Arabidopsis*.

| Genotype                             | Average number of rosette leaves when flowering (n: plants) | Average number of cauline leaves when flowering (n: plants) | Phenotype        |
|--------------------------------------|-------------------------------------------------------------|-------------------------------------------------------------|------------------|
| Col (wild-type)                      | 11.1 ±1.4 (n = 20)                                          | 2.9 ±1.2 (n = 20)                                           | Normal flowering |
| <i>ft-10</i> ( <i>FT</i> mutant)     | 42.3 ±9.8 (n = 20)                                          | 7.8 ±1.9 (n = 20)                                           | Late flowering   |
| <i>ft-10/SUC2:AtFT</i>               | 5.3 ±0.8 (n = 19)                                           | 1.7 ±0.8 (n = 19)                                           | Early flowering  |
| <i>ft-10/SUC2:mAtFT</i>              | 40.2 ±5.5 (n = 20)                                          | 7.4 ±2.1 (n = 20)                                           | Late flowering   |
| <i>ft-10/SUC2:FT<sub>Y85A</sub></i>  | 30.0 ±9.3 (n = 18)                                          | 9.4 ±3.1 (n = 18)                                           | Late flowering   |
| <i>ft-10/SUC2:FT<sub>R119A</sub></i> | 43.6 ±1.5 (n = 16)                                          | 6.6 ±0.6 (n = 16)                                           | Late flowering   |
| <i>ft-10/SUC2:FT<sub>R173A</sub></i> | 35.0 ±2.5 (n = 20)                                          | 7.8 ±2.5 (n = 20)                                           | Late flowering   |
| <i>ft-10/SUC2:FT<sub>T27A</sub></i>  | 5.4 ±2.0 (n = 19)                                           | 3.7 ±2.5 (n = 19)                                           | Early flowering  |

72
